# Supplementary material
Source: PubMed Central journal article supplement (PMC4922145)
Supplement: pnas.1601256113.sapp.pdf [file pnas.1601256113.sapp.pdf]

## Supporting Information (SI Appendix)

Chai et al. 2016 – [www.pnas.org](http://www.pnas.org)

### A Class II KNOX gene, *KNOX4*, controls seed physical dormancy

Maofeng Chai, Chuanen Zhou, Isabel Molina, Chunxiang Fu, Jin Nakashima, Guifen Li, Wenzheng Zhang, Jongjin Park, Yuhong Tang, Qingzhen Jiang and Zeng-Yu Wang

#### Supplementary Figures

**Movie 1.** Imbibition process of wild-type and *knox4* mutant seeds of *Medicago truncatula* in water.

**Fig. S1.** Seed vigor test and genetic segregation analysis for the non-dormant mutant in *M. truncatula*.

**Fig. S2.** Molecular cloning of *KNOX4* in *M. truncatula*.

**Fig. S3.** Surface feature of wild-type and *knox4* seed coat.

**Fig. S4.** Wax load in seed surfaces of wild type and *knox4-1* mutant.

**Fig. S5.** Volcano plot of 2-fold down-regulated and up-regulated genes in *knox4* knockout (KO) mutant.

**Fig. S6A.** Flow chart of GO enrichment with 2-fold down-regulated genes in *knox4* mutant.

**Fig. S6B.** MapMan general overview of differentially expressed genes related to cell wall pathways and lipid pathways.

**Fig. S7.** Phenotype observation of GFP:*KNOX4* complementation lines and chromatin immunoprecipitation (ChIP) analysis.

**Fig. S8.** A proposed model for impermeable seed coat development regulated by *KNOX4* in *M. truncatula*.

**Fig. S9.** Toluidine blue staining of *knox4* mutant seeds in *M. truncatula*.

## Supplementary Tables

**Table S1.** The most differentially expressed genes found in a microarray analysis of *knox4* and wild-type seed coat.

**Table S2.** Species used for the phylogenetic analysis.

**Table S3.** Primers used in this study

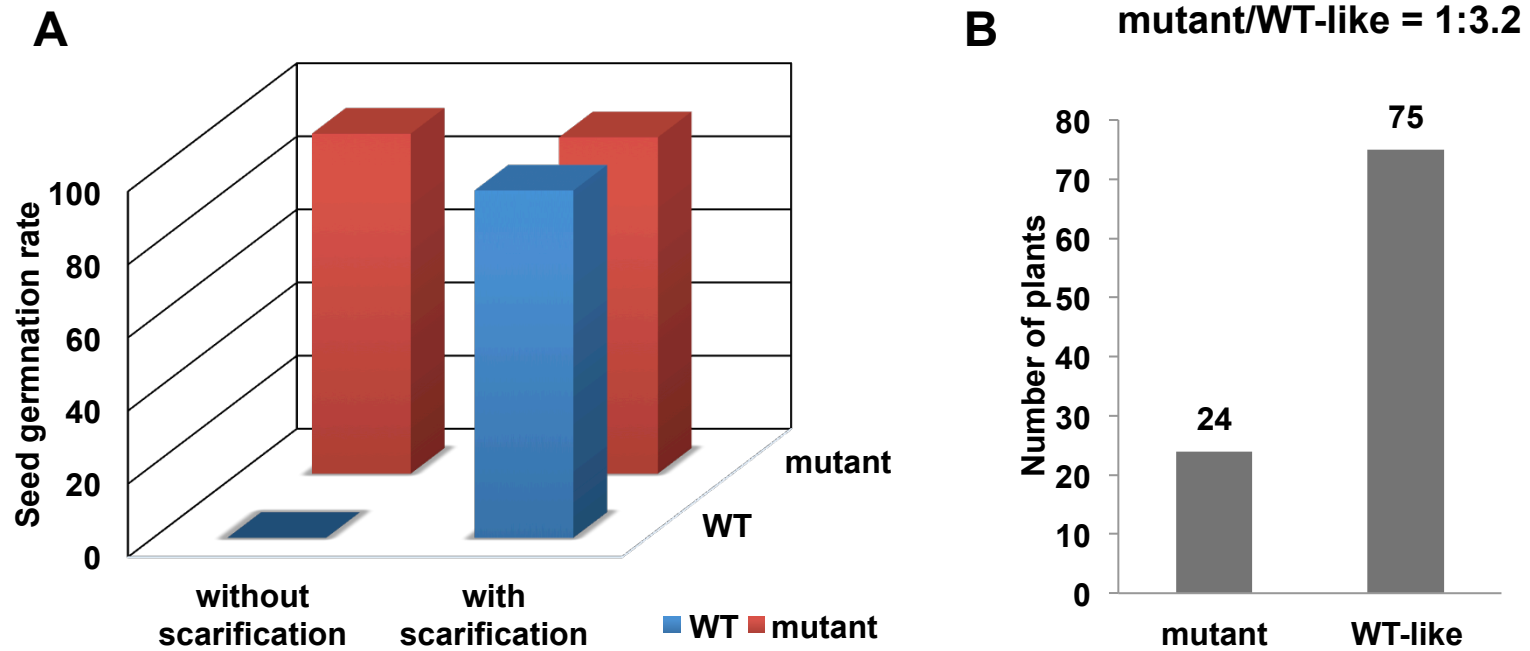

**Fig. S1.** Seed vigor test and genetic segregation analysis for the non-dormant mutant in *M. truncatula*.

(A) Seed germination frequency of wild type (WT) and mutant with and without scarification treatment in sterile water for 2 days.

(B) Number of wild-type-like and mutant plants obtained from F2 population.

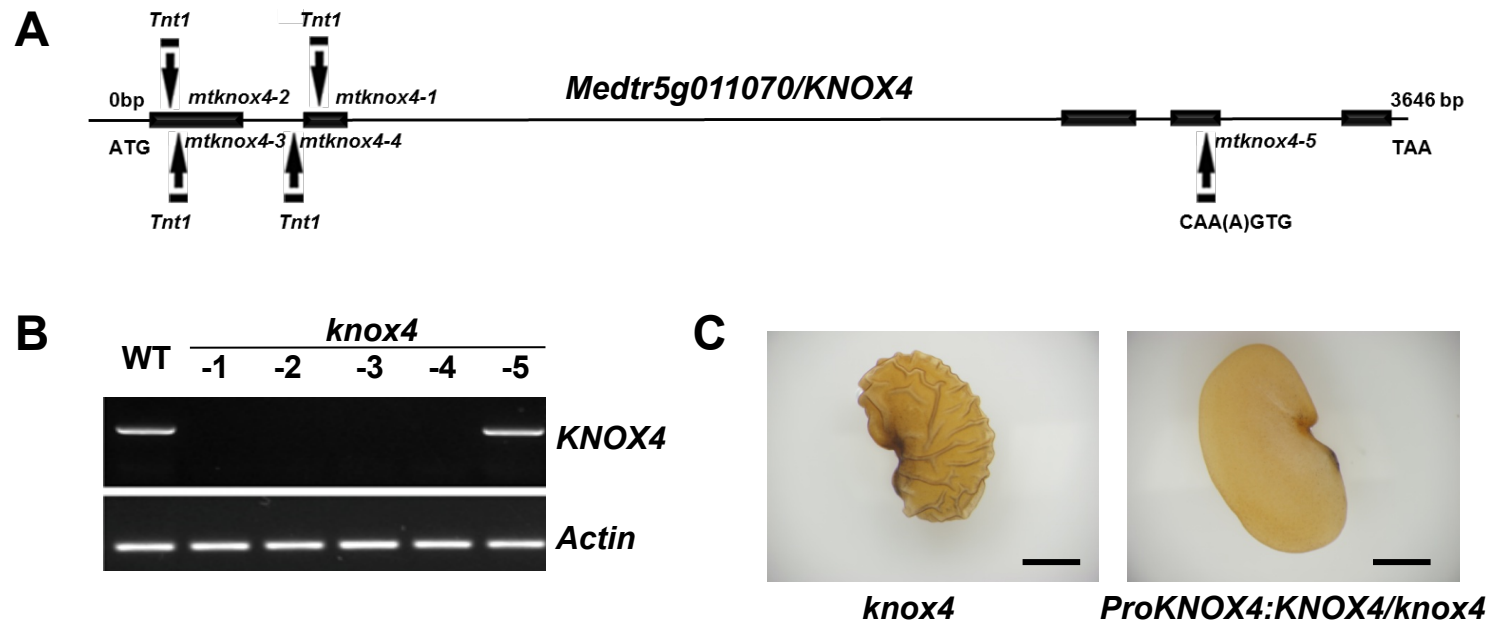

**Fig. S2.** Molecular cloning of *KNOX4* in *M. truncatula*.

(A) Schematic diagram of gene structure and five allele sites of *KNOX4*. Boxes represent exons and lines represent introns.

(B) RT-PCR analysis of *KNOX4* transcripts in the wild type and *knox4* mutants (*knox4-1* to *knox4-5*). Actin was used as the loading control.

(C) Phenotype observation of mutant and *KNOX4* complementation lines with water imbibition assay. Bar = 1mm.

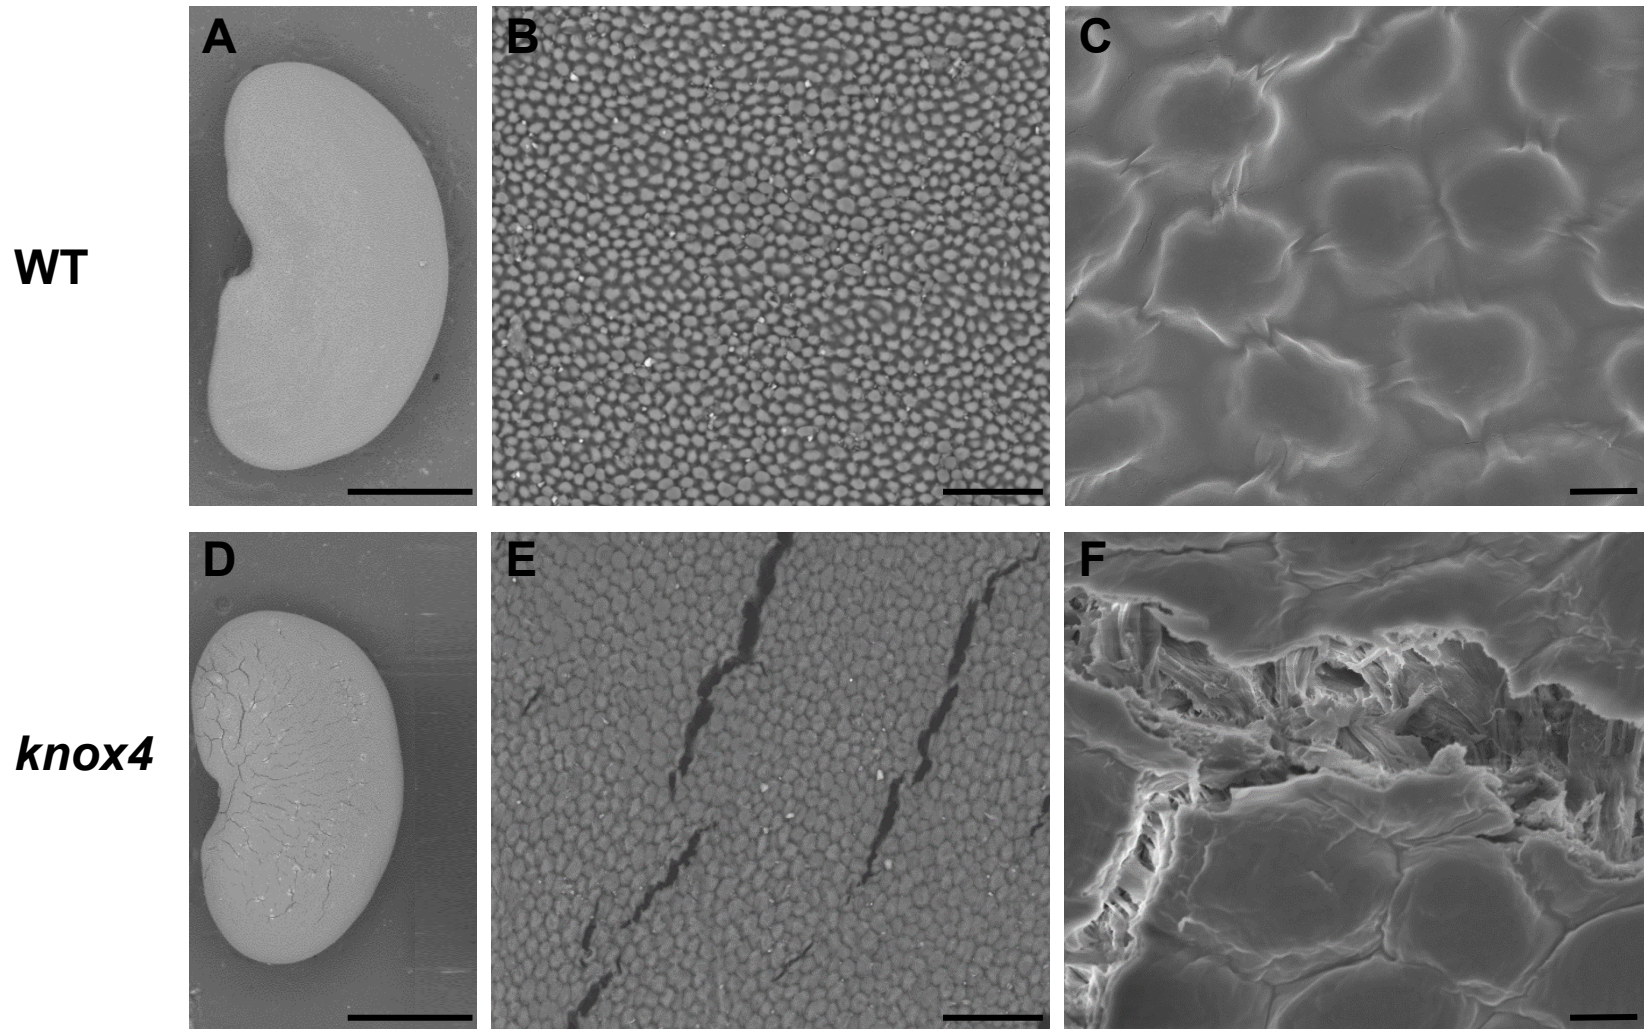

**Fig. S3.** Surface feature of wild-type and *knox4* seed coat.

(A-F) Scanning electron microscope images of seed coat from wild type (A, B, C) and *knox4* mutant (D, E, F).

Minor cracks occurred under SEM with vacuum after 30 min. (A, D) Bar = 1cm. (B, E) Bar = 200 $\mu$ m. (C, F) Bar = 2 $\mu$ m.

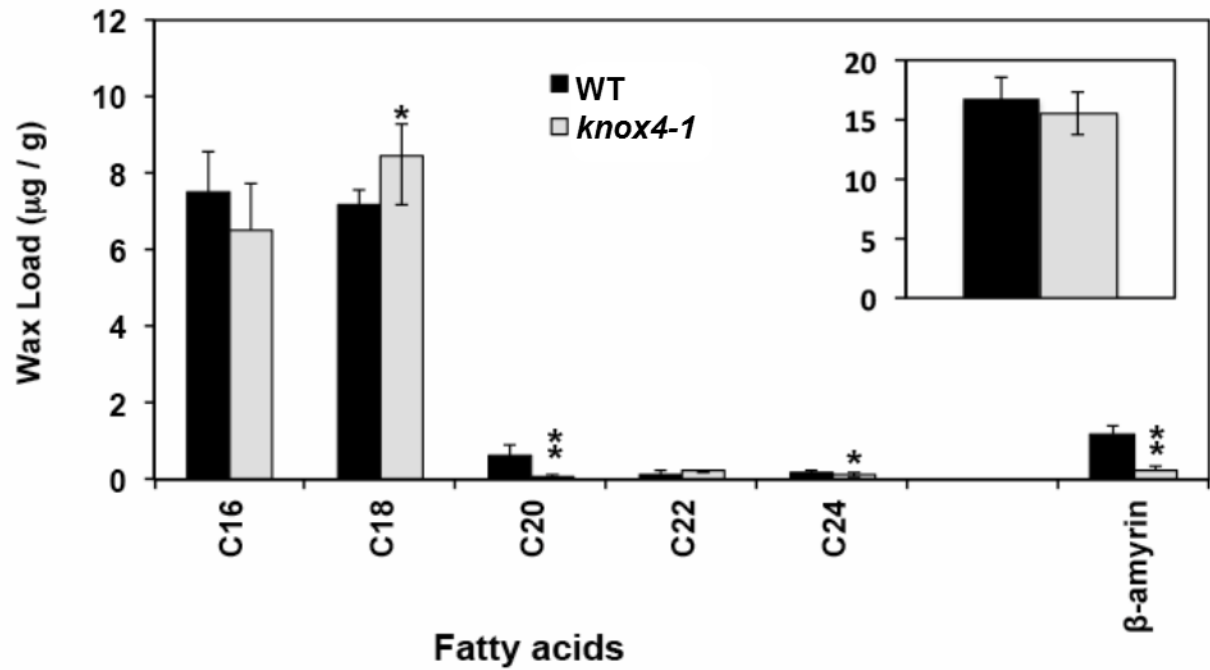

**Fig. S4.** Wax load in seed surfaces of wild type and *knox4-1* mutant. Inset: total seed wax loads.

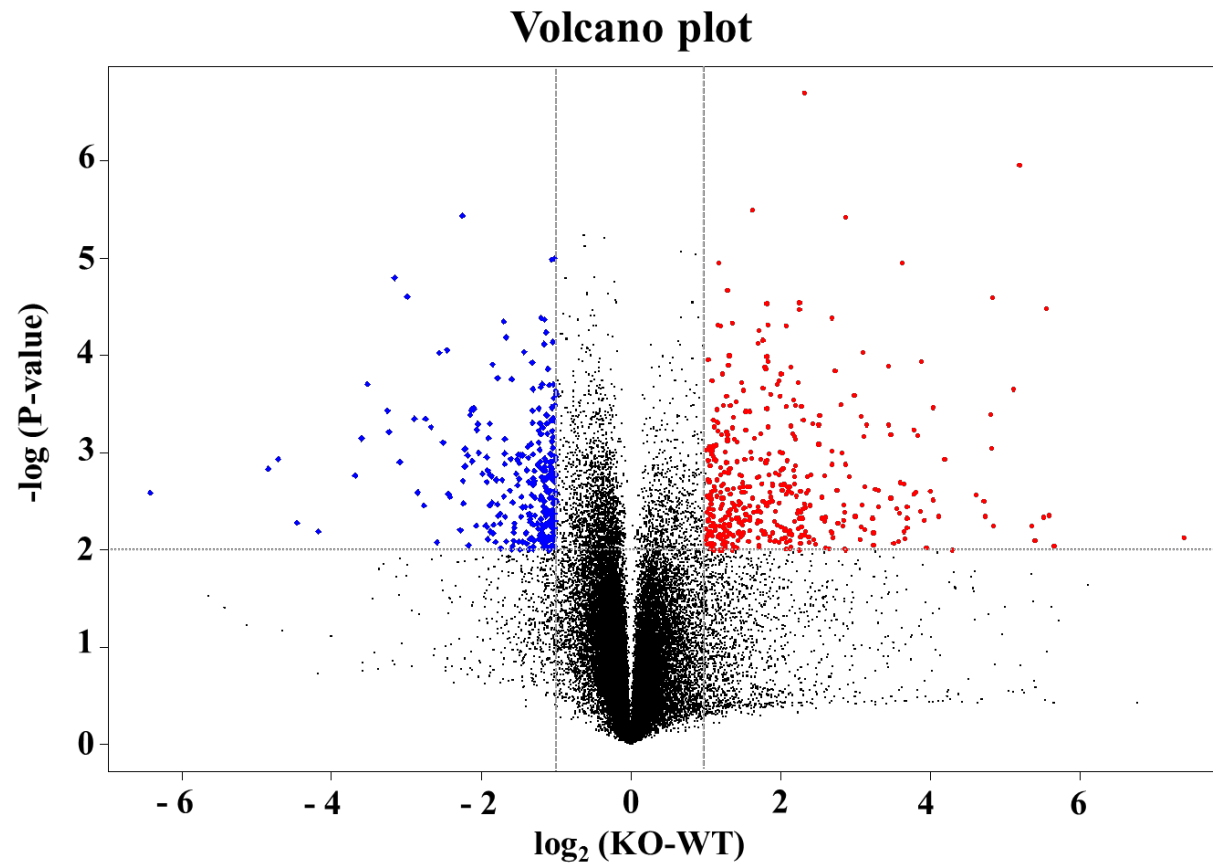

**Blue dot:** > 2 fold low expression with statistically highly significance (P- value < 0.01) in KO.

**Red dot:** > 2 fold high expression with statistically highly significance (P- value < 0.01) in KO.

**Fig. S5.** Volcano plot of 2-fold down-regulated and up-regulated genes in *knox4* knockout (KO) mutant.

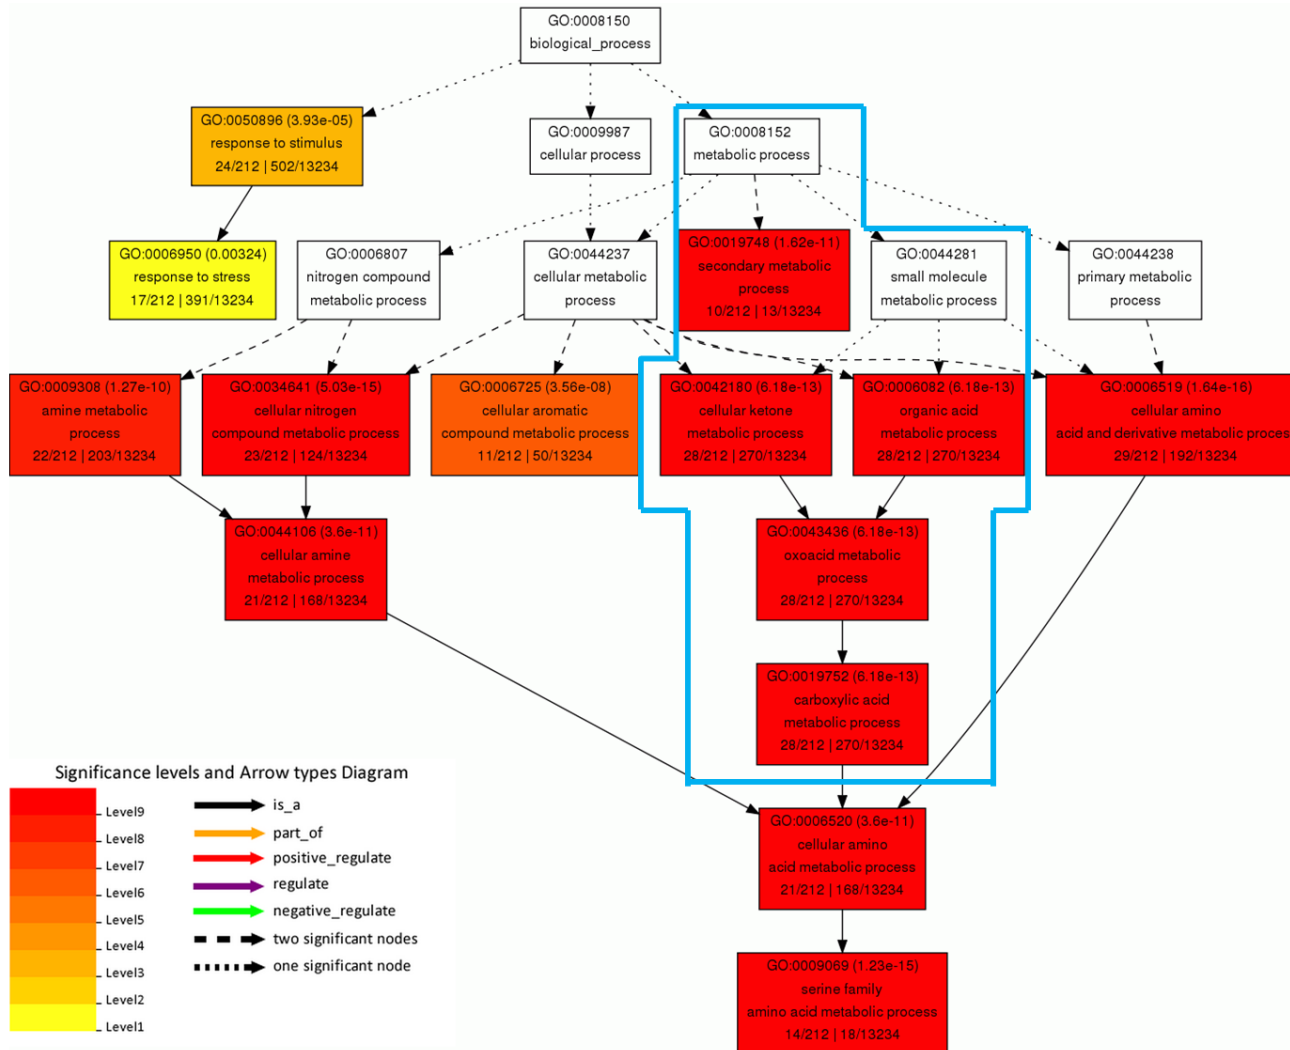

**Fig. S6A.** Flow chart of GO enrichment with 2-fold down-regulated genes in *knox4* mutant. Blue box: 2 fold lower expression (P- value < 0.01) in mutant.



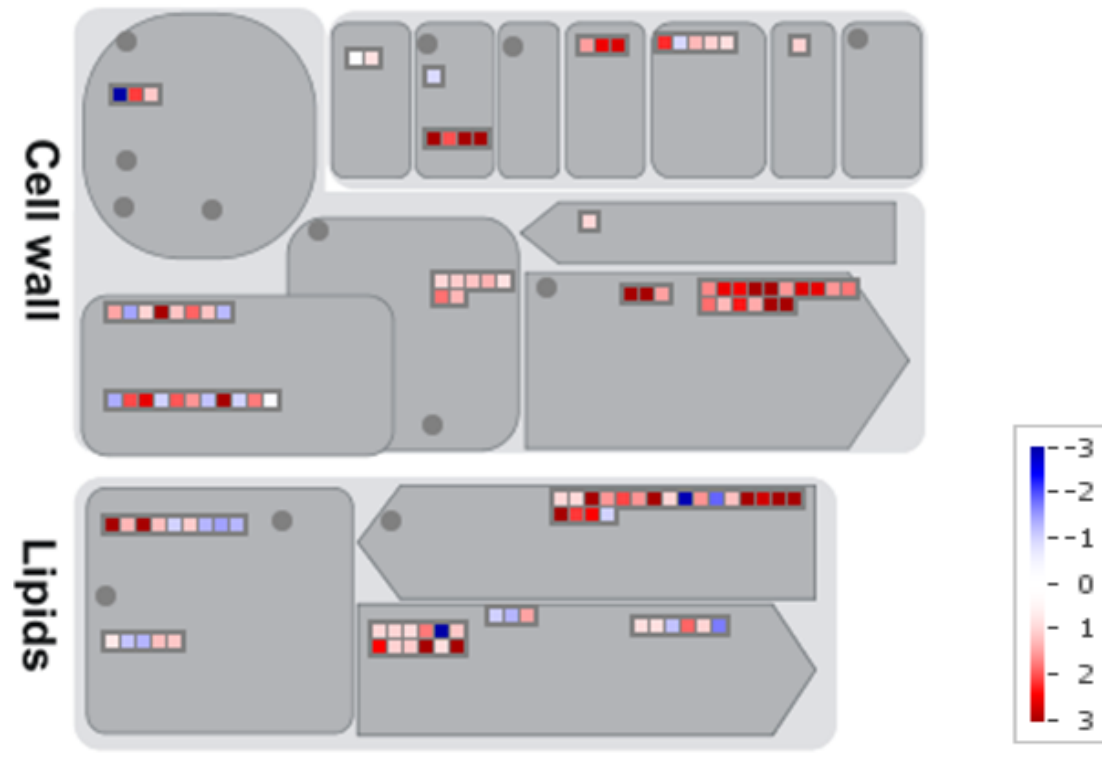

**Fig. S6B.** MapMan general overview of differentially expressed genes related to cell wall pathways and lipid pathways. Each square represents a gene. Red and blue indicate higher and lower expression in wild type compared to mutant. The figure is shown in log<sub>2</sub>-transformed ratios of wild-type divided by mutant.

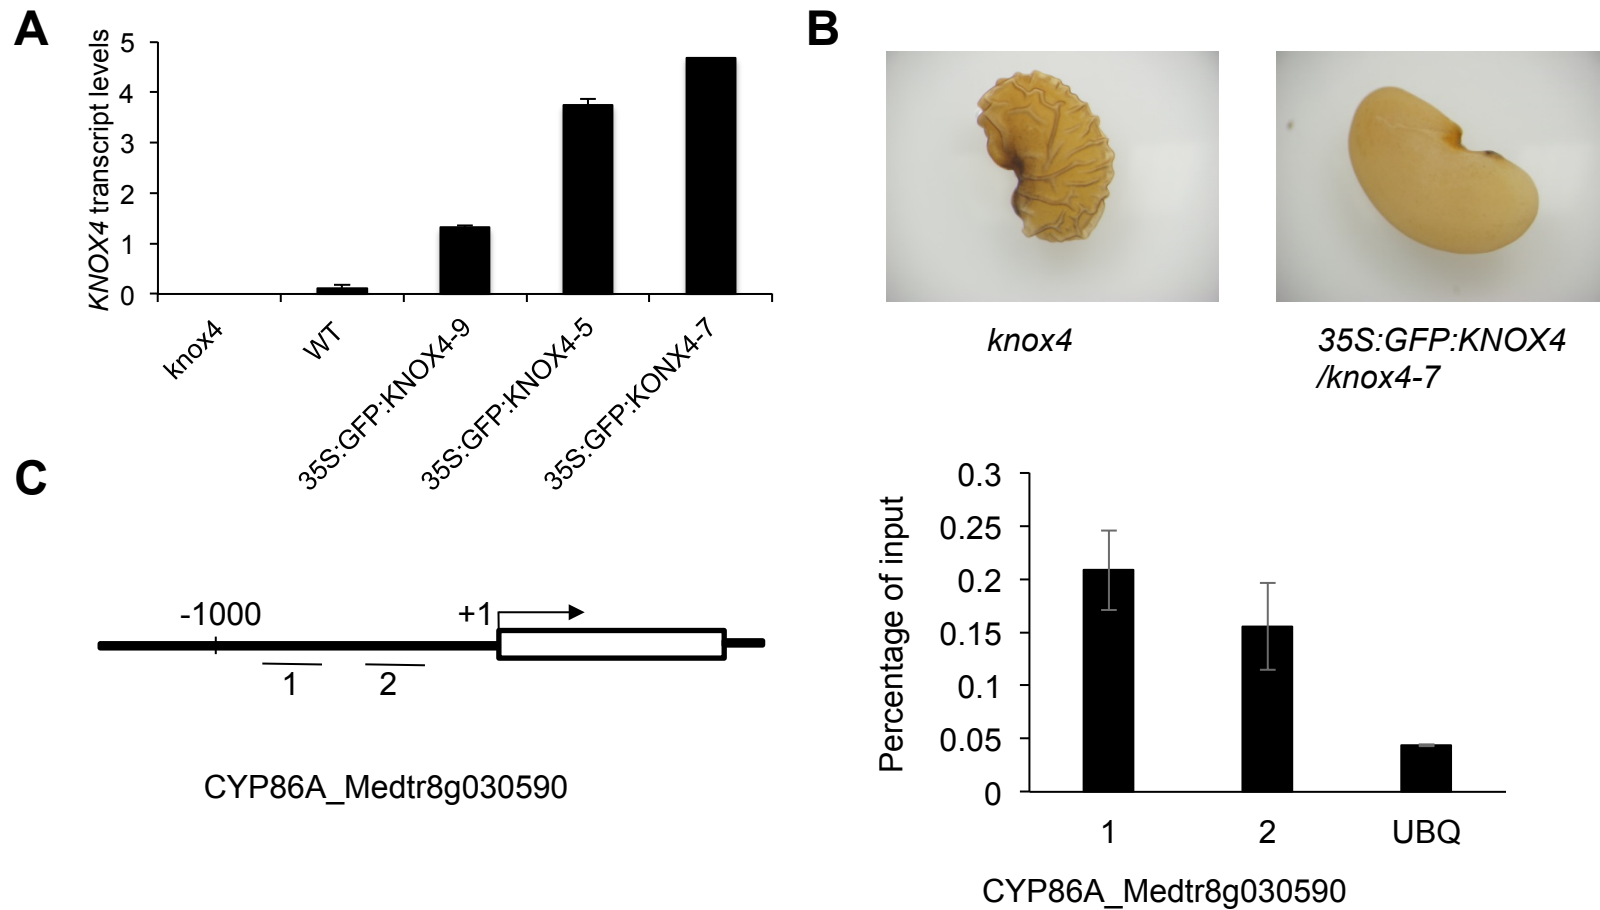

**Fig. S7.** Phenotype observation of GFP:KNOX4 complementation lines and chromatin immunoprecipitation (ChIP) analysis. (A) Transcript levels of *KNOX4* in mutant, wild type and GFP:KNOX4 complementation lines, as determined by quantitative real-time PCR (qRT-PCR). (B) Imbibition of seeds of wild-type and GFP:KNOX4 complementation lines in water. (C) Chromatin Immunoprecipitation of GFP:KNOX4 protein with *CYP86A* gene chromatin regions. PCR amplification locations (bars with numbers) were diagrammed in the graph. The ChIP experiments were repeated three times using independent biological replicates with similar results.

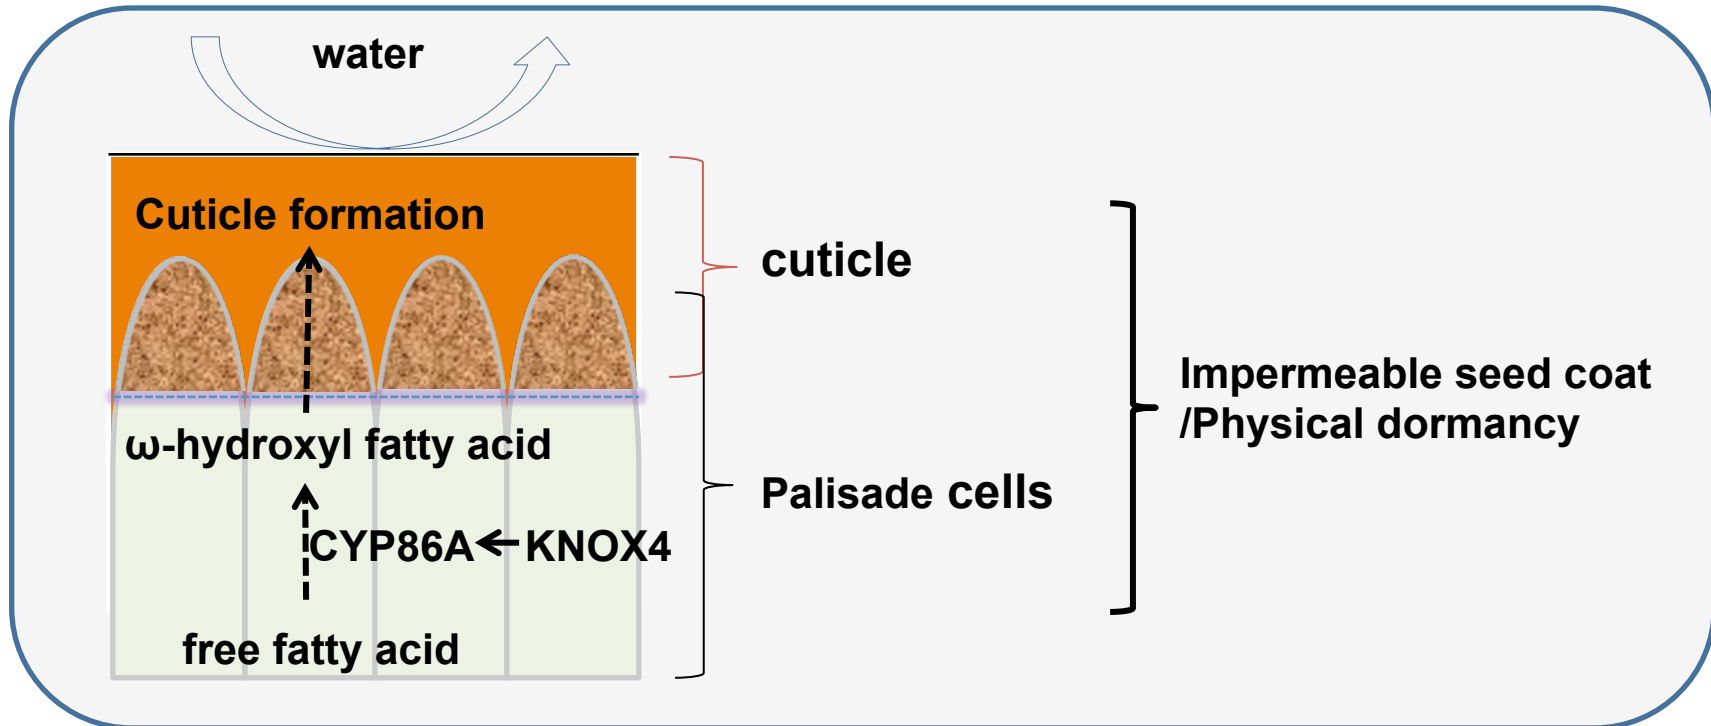

**Fig. S8.** A proposed model for impermeable seed coat development regulated by *KNOX4* in *M. truncatula*. In palisade cells, CYP86A is a crucial enzyme for cuticle formation. CYP86A gene is regulated by *KNOX4* in *M. truncatula*. Rigid palisade layer of cells covered with an intact cuticle layer constitute an impermeable seed coat.

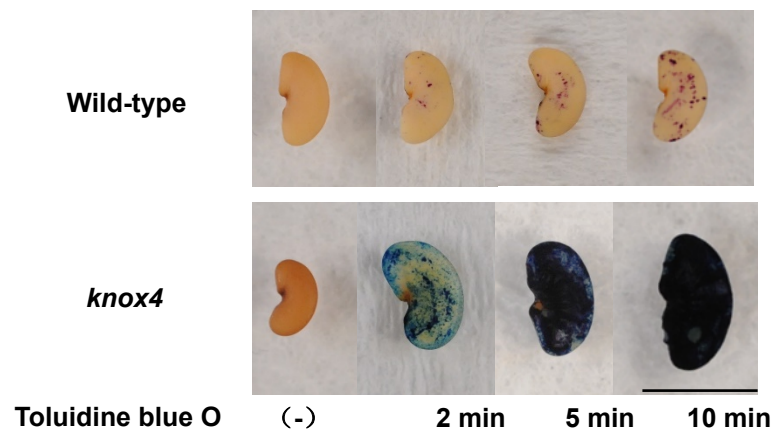

**Fig. S9.** Toluidine blue staining of *knox4* mutant seeds in *M. truncatula*. Seeds were immersed in 0.05% toluidine blue O for 2, 5 and 10 min and rinsed with water. Bar = 0.5 cm.

**Table S1. The most differentially expressed genes found in a microarray analysis of *knox4* and wild-type seed coat.**

| Probe sets          | Gene name/annotation                                                                   | Gene ID         | Fold change<br>( <i>knox4</i> /WT) | P Value |
|---------------------|----------------------------------------------------------------------------------------|-----------------|------------------------------------|---------|
| Mtr.15209.1.S1_at   | Phosphatidylinositol transporter                                                       | Medtr4g096250.1 | 0.02                               | 0.0296  |
| Mtr.49936.1.S1_at   | Cytochrome P450 , ATT1                                                                 | Medtr8g030590.1 | 0.1258                             | 2E-05   |
| Mtr.49305.1.S1_at   | KCS12   3-ketoacyl-CoA synthase 12<br>Glucan endo-1,3-beta-glucosidase-like<br>protein | Medtr2g114190.1 | 0.1313                             | 0.042   |
| Mtr.16532.1.S1_at   | Cell wall pectin metabolic process                                                     | Medtr4g133690.1 | 0.0233                             | 0.0393  |
| Mtr.9377.1.S1_at    | Represses phenylpropanoid biosynthesis                                                 | Medtr1g055085.1 | 0.0396                             | 0.0669  |
| Mtr.16432.1.S1_at   | cell wall protein                                                                      | Medtr5g004980.1 | 0.055                              | 0.0064  |
| Mtr.8859.1.S1_at    | Represses phenylpropanoid biosynthesis                                                 | Medtr5g087140.1 | 0.0625                             | 0.077   |
| Mtr.34401.1.S1_s_at | D-arabinono-1,4-lactone oxidase                                                        | Medtr5g087140.1 | 0.0776                             | 0.0017  |
| Mtr.49452.1.S1_at   | ANR , Negative regulator of flavonoid<br>biosynthesis                                  | Medtr7g145950.1 | 0.0834                             | 0.1756  |
| Mtr.44985.1.S1_at   | Inorganic pyrophosphatase                                                              | Medtr4g092080.1 | 0.0868                             | 0.0002  |
| Mtr.12295.1.S1_at   | CHS WD40 same pattern                                                                  | Medtr8g077180.1 | 0.0912                             | 0.0319  |
| Mtr.49572.1.S1_s_at | CHS WD40 same pattern                                                                  | Medtr5g007810.1 | 0.1175                             | 0.029   |
| Mtr.20185.1.S1_x_at | CHS WD40 same pattern                                                                  | Medtr5g007840.1 | 0.1726                             | 0.0207  |

**Table S2. Species used for the phylogenetic analysis.**

All information used for phylogenetic analyses comes from Phytozome v11.

| Organism                        | Version   | Common Name                               | Source                                                    |
|---------------------------------|-----------|-------------------------------------------|-----------------------------------------------------------|
| Aquilegia coerulea<br>Goldsmith | v1.1      | Colorado blue columbine                   | JGI annotation of assembly v1                             |
| Amborella trichopoda            | v1        | Amborella                                 | The Amborella Genome Project                              |
| Arabidopsis lyrata              | v1.0      | Lyre-leaved rock cress                    | JGI release v1.0                                          |
| Arabidopsis thaliana columbia   | TAIR10    | Thale cress                               | The Arabidopsis Information Resource                      |
| Boechera stricta                | v1.2      | Drummond's rock cress                     | JGI annotation of assembly v1                             |
| Brachypodium distachyon         | v3.1      | Purple false brome                        | JGI annotation of assembly v3.0 (strain Bd21)             |
| Brachypodium stacei             | v1.1      | <i>B. stacei</i>                          | JGI annotation of assembly v1.0 (strain ABR114)           |
| Brassica rapa FPsc              | v1.3      | Turnip mustard - FasPlant self-compatible | JGI annotation of assembly v1                             |
| Capsella grandiflora            | v1.1      | -                                         | JGI annotation of assembly v1                             |
| Capsella rubella                | v1.0      | Red shepherd's purse                      | JGI annotation of assembly v1                             |
| Carica papaya                   | ASGPBv0.4 | Papaya                                    | ASGPB release of 2007                                     |
| Chlamydomonas reinhardtii       | v5.5      | Green Algae                               | JGI v5.0 assembly, JGI annotation based on Augustus u11.6 |

|                       |            |                     |                                                                                       |
|-----------------------|------------|---------------------|---------------------------------------------------------------------------------------|
| Citrus clementina     | v1.0       | Clementine          | JGI annotation of assembly v1                                                         |
| Citrus sinensis       | v1.1       | Sweet orange        | JGI annotation of assembly v1                                                         |
| Cucumis sativus       | v1.0       | Cucumber            | from Roche 454 assembly and JGI 2009 annotation pipeline                              |
| Eucalyptus grandis    | v2.0       | Eucalyptus          | JGI annotation v2.0 (mapping of v1.1 models forward) on assembly v2.0                 |
| Eutrema salsugineum   | v1.0       | Salt cress          | JGI annotation of assembly v1                                                         |
| Fragaria vesca        | v1.1       | Woodland strawberry | Fragaria vesca Genome v1.1 from Sulaev et al with annotations from v1.0               |
| Glycine max           | Wm82.a2.v1 | Soybean             | JGI annotation of assembly v2.0                                                       |
| Gossypium raimondii   | v2.1       | Cotton              | JGI annotation of assembly v2.0                                                       |
| Kalanchoe marnieriana | v1.1       | Marnier's kalanchoe | JGI annotation v1.1 on assembly v1.0                                                  |
| Linum usitatissimum   | v1.0       | Flax                | BGI v1.0 on assembly v1.0, provided by Mike Deyholos at the University of Alberta     |
| Malus domestica       | v1.0       | Apple               | Genome Database for Rosaceae                                                          |
| Manihot esculenta     | v6.1       | Cassava             | JGI annotation v6.1 of assembly v6                                                    |
| Medicago truncatula   | Mt4.0v1    | Barrel medic        | JCVI Medicago Truncatula Genome Project                                               |
| Mimulus guttatus      | v2.0       | Monkey flower       | JGI annotation of assembly v2.0                                                       |
| Musa acuminata        | v1         | Banana              | Release v1 from The Banana Genome Hub                                                 |
| Oryza sativa          | v7.0       | Rice                | MSU Release 7 on assembly Os-Nipponbare-Reference-IRGSP-1.0, TE inactivated/corrected |

|                                   |           |                   |                                                                                                                       |
|-----------------------------------|-----------|-------------------|-----------------------------------------------------------------------------------------------------------------------|
| <i>Panicum hallii</i>             | v2.0      | Hall's panicgrass | JGI v1.1 annotation mapped forward to assembly v2.0                                                                   |
| <i>Panicum virgatum</i>           | v1.1      | Switchgrass       | JGI annotation of assembly v1.0                                                                                       |
| <i>Phaseolus vulgaris</i>         | v1.0      | Common bean       | JGI annotation of assembly v1.0                                                                                       |
| <i>Physcomitrella patens</i>      | v3.3      | Moss              | COSMOSS annotation of JGI assembly v3                                                                                 |
| <i>Populus trichocarpa</i>        | v3.0      | Poplar            | JGI annotation of assembly v3                                                                                         |
| <i>Prunus persica</i>             | v2.1      | Peach             | JGI annotation v2.1 of assembly v2.0                                                                                  |
| <i>Ricinus communis</i>           | v0.1      | Castor bean       | TIGR release 0.1                                                                                                      |
| <i>Salix purpurea</i>             | v1.0 (ER) | Willow            | JGI annotation v1.0 (in collaboration with JCVI) of assembly v1.0                                                     |
| <i>Selaginella moellendorffii</i> | v1.0      | Spikemoss         | from original JGI FilteredModels3 database Selmo1, with only one haplotypic variant                                   |
| <i>Setaria italica</i>            | v2.2      | Foxtail millet    | JGI annotation of assembly version 2.0                                                                                |
| <i>Setaria viridis</i>            | v.1       | Green foxtail     | JGI annotation of assembly version 1.0                                                                                |
| <i>Solanum lycopersicum</i>       | iTAGv2.3  | Tomato            | SGN Tomato Genome Project ITAG2.3                                                                                     |
| <i>Solanum tuberosum</i>          | v3.4      | Potato            | SGN Solanum tuberosum Group Phureja DM1-3 516R44 (CIP801092) Genome Annotation v3.4 mapped to pseudomolecule sequence |
| <i>Sorghum bicolor</i>            | v3.1      | Cereal grass      | JGI annotation of assembly v3.0                                                                                       |
| <i>Spirodela polyrhiza</i>        | v2        | Greater Duckweed  | MIPS/IBIS annotation                                                                                                  |
| <i>Sphagnum fallax</i>            | v0.5      | Bog moss          | JGI annotation of assembly v0.5                                                                                       |
| <i>Theobroma cacao</i>            | v1.1      | Cacao             | International Wheat Genome Sequencing Consortium                                                                      |



|                |               |       |                                                                                                   |
|----------------|---------------|-------|---------------------------------------------------------------------------------------------------|
| Vitis vinifera | Genoscope.12X | Grape | Genoscope                                                                                         |
| Zea mays       | 6a            | Maize | Zea mays gene annotation v6a on B73 assembly<br>AGPv3 from the Maize Genome Sequencing<br>Project |

**Table S3. Primers used in this study**

| <b>Prime name</b> | <b>Primer sequence</b>                            | <b>Application</b>                                                |
|-------------------|---------------------------------------------------|-------------------------------------------------------------------|
| MtKNOX4-F2        | ATAGAGTGGTCCTCAACCTCATC<br>CATACCTGTGAGGGCTTGTAAG | For confirmation of the Tnt1 insertion of knox4-1,knox4-2,knox4-3 |
| MtKNOX4-R3        | GT                                                | For confirmation of the Tnt1 insertion of knox4-1,knox4-2,knox4-3 |
| Tnt1-Reverse-F2   | GGCTACCAAACCAAAGAAAAC<br>T                        | For confirmation of the Tnt1 insertion of knox4-1,knox4-2,knox4-3 |
| Tnt1-6R           | GCTACCAAACCAAACCAAGTCAA                           | For confirmation of the Tnt1 insertion of knox4-1,knox4-2,knox4-3 |
| Tnt1-4F           | TACCGTATCTCGGTGCTACA<br>TCAGGAGTGAGTTTGGGAGAAG    | For confirmation of the Tnt1 insertion of knox4-1,knox4-2,knox4-3 |
| M4like LP         | G                                                 | For confirmation of the Tnt1 insertion of knox4-4 and knox4-5     |
| M4like RP         | TTTGTAATCAGTGTGGGCTCA<br>CACCATGCAAGAACCAAGCTTA   | For confirmation of the Tnt1 insertion of knox4-4 and knox4-5     |
| MK4 F             | GGGATG<br>TTACTACCTCTTGCCTTCGACT                  | For cloning of the MtKNOX4 full length CDS                        |
| MK4 R             | TC                                                | For cloning of the MtKNOX4 full length CDS                        |
| K4-F              | ACTCGACAACCTCCTCGCACAA                            | For cloning of the KNOX4 cDNA as probe for in situ hybridization  |
| K4-R              | TTTGCTTCAGCTGCAGTCCTGT<br>CACCTTTAGTGCTCATCAAGTTT | For cloning of the KNOX4 cDNA as probe for in situ hybridization  |
| MK4P F            | GTTCTCGCC<br>TTACTACCTCTTGCCTTCGACT               | For making the complementation construct                          |
| MK4 R             | TC                                                | For making the complementation construct                          |
| MK4P F-2          | CACCTATTCAAAGCAATCTACCT<br>CTGCCACTA              | For cloning of the KNOX4 promoter                                 |
| MK4P R-3          | TTCTGAAGAAAATGAAAGCTTGT<br>TG                     | For cloning of the KNOX4 promoter                                 |
| MtATT1/NF671 8 F1 | ATTACTTTTAACGGCCATAACAG<br>CT                     | For confirmation of the Tnt1 insertion of CYP86A_Medtr8g030590    |
| MtATT1/NF671 8 R1 | TGAATAACCAACCAAAGAACCA<br>G                       | For confirmation of the Tnt1 insertion of CYP86A_Medtr8g030590    |
| SQ34 CHIP F1      | GGTAGGTTGCTCACCAAACG                              | For CHIP-PCR analysis of CYP86A_Medtr8g030590                     |
| SQ34 CHIP R1      | AGCAAGATGAGGGTGCTGTTT                             | For CHIP-PCR analysis of CYP86A_Medtr8g030590                     |
| SQ34 CHIP F2      | ACAGGTGGGGTGATTTCAACT                             | For CHIP-PCR analysis of CYP86A_Medtr8g030590                     |
| SQ34 CHIP R2      | AGGCCAGACTGGTTTTCTTCA                             | For CHIP-PCR analysis of CYP86A_Medtr8g030590                     |
| MtUBC Q F-2       | CTGACAGCCCACTGAATTGTGA                            | For CHIP-PCR analysis of UBQ control                              |
| MtUBC Q R-2       | TTTTGGCATTGCTGCAAGC                               | For CHIP-PCR analysis of UBQ control                              |
| Mt-ACTIN11-F      | ACGAGCGTTTCAGATG                                  | RT-PCR control                                                    |
| Mt-ACTIN11-R      | ACCTCCGATCCAGACA                                  | RT-PCR control                                                    |
